# Supplementary material for: Uranyl phosphonates: crystalline materials and nanosheets for temperature sensing
Source: Royal Society of Chemistry journal article supplement (doi:10.1039/d1dt02977k), 2021-01-01
Supplement: d1dt02977k1.pdf [file d1dt02977k1.pdf]

## Supporting Information

### **Uranyl phosphonates: crystalline materials and nanosheets for temperature sensing**

Ge-Hua Wen,<sup>a</sup> Xiu-Mei Chen,<sup>b</sup> Kui Xu,<sup>a</sup> Xiaoji Xie,<sup>b</sup> Song-Song Bao,<sup>a\*</sup> and Li-Min Zheng<sup>\*a</sup>

**Table S1.** Selected bond lengths (Å) and angles (°) for **1**.

| Bond      | Length [Å] | Bond       | Length [Å] |
|-----------|------------|------------|------------|
| U1–O6     | 1.763(3)   | O6A–U1–O1A | 90.41(13)  |
| U1–O6A    | 1.763(3)   | O6–U1–O2B  | 88.91(13)  |
| U1–O1     | 2.299(3)   | O6A–U1–O2B | 91.09(13)  |
| U1–O1A    | 2.299(3)   | O1–U1–O2B  | 89.35(11)  |
| U1–O2B    | 2.338(3)   | O1A–U1–O2B | 90.65(11)  |
| U1–O2C    | 2.338(3)   | O6–U1–O2C  | 91.09(13)  |
| O6–U1–O1  | 90.41(13)  | O6A–U1–O2C | 88.91(13)  |
| O6A–U1–O1 | 89.59(13)  | O1–U1–O2C  | 90.65(11)  |
| O6–U1–O1A | 89.59(13)  | O1A–U1–O2C | 89.35(11)  |

Symmetric codes for **1**: A: -x+2, -y+1, -z; B: x+1, y, z; C: -x+1, -y+1, -z.

**Table S2.** The parameters of H-bonding for **1**.

| D–H...A                   | d <sub>H...A</sub> (Å) | d <sub>D...A</sub> (Å) | Angle <sub>D–H...A</sub> (°) |
|---------------------------|------------------------|------------------------|------------------------------|
| O5–H5...O2 <sup>a</sup>   | 2.08                   | 2.919(5)               | 176.5                        |
| O13–H13...O4 <sup>a</sup> | 1.88                   | 2.588(5)               | 140.4                        |
| C4–H4...O6 <sup>b</sup>   | 2.68                   | 3.381(6)               | 131.5                        |
| C5–H5A...O5 <sup>c</sup>  | 2.91                   | 3.843(6)               | 167.4                        |

Symmetric codes for **1**: a: -x+1, -y+1, -z+1; b: x, -1+y, z; c: 2-x, -y, 1-z.

**Table S3.** Selected bond lengths (Å) and angles (°) for **2**.

| Bond       | Length [Å] | Bond         | Length [Å] |
|------------|------------|--------------|------------|
| U1-O1      | 2.511(6)   | O6-U1-O3     | 156.6(2)   |
| U1-O3      | 2.511(6)   | O1A-U1-O3    | 66.0(2)    |
| U1-O4      | 1.771(7)   | O3A-U1-O3    | 121.81(17) |
| U1-O5      | 1.770(7)   | O1-U1-O3     | 56.8(2)    |
| U1-O6      | 2.221(7)   | O10-U2-O9    | 178.6(3)   |
| U1-O1A     | 2.364(7)   | O10-U2-O8    | 91.9(3)    |
| U1-O3B     | 2.374(7)   | O9-U1-O8     | 89.1(3)    |
| U2-O8      | 2.313(7)   | O10-U2-O7C   | 91.0(3)    |
| U2-O9      | 1.788(7)   | O9-U2-O7C    | 88.5(3)    |
| U2-O10     | 1.757(7)   | O8-U2-O7C    | 157.4(2)   |
| U2-O7C     | 2.322(7)   | O9-U2-O2B    | 92.7(3)    |
| U2-O2B     | 2.325(6)   | O8-U2-O2B    | 79.1(2)    |
| U2-O11D    | 2.455(7)   | O7c-U2-O2B   | 78.6(2)    |
| U2-O12D    | 2.511(7)   | O10-U2-O11B  | 88.0(3)    |
| O5-U1-O4   | 177.6(3)   | O9-U2-O11D   | 91.3(3)    |
| O5-U1-O6   | 93.1(3)    | O8-U2-O11D   | 74.5(2)    |
| O4-U1-O6   | 89.1(3)    | O7c-U2-O11D  | 128.0(2)   |
| O5-U1-O1A  | 89.0(3)    | O2b-U2-O11D  | 153.2(3)   |
| O4-U1-O1A  | 90.1(3)    | O10-U2-O12D  | 89.3(3)    |
| O6-U1-O1A  | 90.8(2)    | O9-U2-O12D   | 89.3(3)    |
| O5-U1-O3A  | 85.4(3)    | O8-U2-O12D   | 126.6(2)   |
| O4-U1-O3B  | 95.8(3)    | O7c-U2-O12D  | 75.8(2)    |
| O6-U1-O3B  | 81.6(2)    | O2b-U2-O12D  | 154.3(2)   |
| O1a-U1-O3B | 170.2(2)   | O11d-U2-O12D | 52.2(2)    |
| O5-U1-O1   | 93.2(3)    | O10-U2-O16D  | 84.2(3)    |
| O4-U1-O1   | 85.4(3)    | O9-U2-O16D   | 94.6(3)    |
| O6-U1-O1   | 146.1(2)   | O8-U2-O16D   | 100.6(3)   |
| O1a-U1-O1  | 122.63(18) | O7c-U2-O16D  | 102.0(3)   |
| O3b-U1-O1  | 65.8(2)    | O2b-U2-O16D  | 172.7(3)   |
| O5-U-O3    | 88.7(3)    | O11d-U2-O16D | 26.2(3)    |
| O4-U1-O3   | 88.9(3)    | O12d-U2-O16D | 26.6(3)    |

Symmetric codes for **2**: A: -x+1, y+1/2, -z+1/2; B: -x+1, y-1/2, -z+1/2; C: x, y-1, z; D: -x+1, -y+1, -z+1.

**Table S4.** The parameters of H-bonding for **2**.

| D-H...A                    | d <sub>H...A</sub> (Å) | d <sub>D...A</sub> (Å) | Angle <sub>D-H...A</sub> (°) |
|----------------------------|------------------------|------------------------|------------------------------|
| O1W-H1WA...O9              | 2.01                   | 2.884(12)              | 151.6                        |
| O1W-H1WB...O11             | 2.01                   | 2.896(12)              | 154.8                        |
| O1W-H1WC...O7 <sup>a</sup> | 2.05                   | 2.979(11)              | 166.7                        |
| O14-H14...O13 <sup>b</sup> | 1.77                   | 2.603(12)              | 170.5                        |

Symmetric codes for **2**: a: -x+1, -y+1, -z+1; b: -x+2, -y+1, -z+1.

**Table S5.** Inductively Coupled Plasm (ICP) analysis of **1** and **2** in the different aqueous solution.

| Sample                         | 1                |                         | 2                |                         |
|--------------------------------|------------------|-------------------------|------------------|-------------------------|
|                                | P content (mg/L) | Dissociation degree (%) | P content (mg/L) | Dissociation degree (%) |
| pH=1                           | 0.289            | 1                       | 0.538            | 2.6                     |
| pH=4                           | 0.320            | 1.1                     | 0.017            | 0.08                    |
| pH=8                           | 0.318            | 1.1                     | 0.019            | 0.09                    |
| pH=10                          | 0.434            | 1.5                     | 0.141            | 0.7                     |
| HNO <sub>3</sub>               | 7.68             | 8.8                     | 3.05             | 5.0                     |
| H <sub>2</sub> SO <sub>4</sub> | 0.73             | 3                       | 0.76             | 1.2                     |
| aqua regia                     | 22.4             | 25.8                    | 9.1              | 14.7                    |

1 mg of sample **1** or **2** was soaked in aqueous solution (3 mL) at variable pH (pH = 1, 4, 8, 10) for 24 h. After centrifuge (rpm 14000) and filter (Syringe filters, aperture: 0.22 $\mu$ m) of the mixture, the concentrations of P element in the filtrate were detected by ICP technique. 1 mg of sample **1** or **2** was soaked in fuming acids (1 mL), then tested by ICP after dilution ten times, the above values has been multiplied by ten.

**Table S6.** The lifetime fit parameters of **1**, **2**, **1-ns@PMMA** and **2-ns@PMMA**.

| 1         | $\tau_1(\mu\text{s})$ | $\tau_2(\mu\text{s})$ | $\tau_{\text{average}}(\mu\text{s})$ | $\chi^2$ |
|-----------|-----------------------|-----------------------|--------------------------------------|----------|
| 77K       | 388.1, 30.3%          | 1110.1, 69.7%         | 891.2                                | 1.10     |
| 300K      | 266.5, 28.7%          | 748.6, 71.3%          | 610.3                                | 1.17     |
| 1-ns@PMMA | $\tau_1(\mu\text{s})$ | $\tau_2(\mu\text{s})$ | $\tau_{\text{average}}(\mu\text{s})$ | $\chi^2$ |
| 77K       | 310.4, 32.5%          | 1078.3, 67.5%         | 828.5                                | 1.10     |
| 300K      | 234.0, 29.5%          | 827.8, 70.5%          | 652.5                                | 1.02     |
| 2         | $\tau_1(\mu\text{s})$ | $\tau_2(\mu\text{s})$ | $\tau_{\text{average}}(\mu\text{s})$ | $\chi^2$ |
| 77K       | 35.6, 51.7%           | 113.6, 48.3%          | 73.2                                 | 1.11     |
| 2-ns@PMMA | $\tau_1(\mu\text{s})$ | $\tau_2(\mu\text{s})$ | $\tau_{\text{average}}(\mu\text{s})$ | $\chi^2$ |
| 77K       | 20.3, 59.4%           | 81.5, 40.6%           | 45.1                                 | 1.19     |

The fluorescence decay curve fitted by double-exponential function (eqn (1)) at different temperatures, respectively. The average lifetime is calculated using eqn (2).

$$I(t) = A + B_1 \exp(-t/\tau_1)^{-1} + B_2 \exp(-t/\tau_2)^{-1} \quad (1)$$

$$\langle t \rangle = (B_1 \tau_1^2 + B_2 \tau_2^2) / (B_1 \tau_1 + B_2 \tau_2) \quad (2)$$

**Table S7.** Comparison of the thermometer performance of **1**, **2** and **2-ns@PMMA** with some reported CP materials.

| Materials                                                                                                     | Temp. range [K] | Max. Sm % K <sup>-1</sup> | References       |
|---------------------------------------------------------------------------------------------------------------|-----------------|---------------------------|------------------|
| TbMOF@7.3%Eu_tfac                                                                                             | 200–325         | 1.33                      | 1                |
| ZJU-88-perylene                                                                                               | 293-353         | 1.28                      | 2                |
| Eu <sub>0.0069</sub> Tb <sub>0.9931</sub> DMBDC                                                               | 50-200          | 1.15                      | 3                |
| {[Tb(cpbOH)(H <sub>2</sub> O) <sub>2</sub> ](cpb)} <sub>∞</sub>                                               | 180-280         | 1.84                      | 4                |
| {[Eu(cpbOH)(H <sub>2</sub> O) <sub>2</sub> ](cpb)} <sub>∞</sub>                                               | 180-280         | 1.40                      |                  |
| Tb <sub>0.9</sub> Eu <sub>0.1</sub> PIA                                                                       | 100-300         | 3.27                      | 5                |
| Tb <sub>0.99</sub> Eu <sub>0.01</sub> (BDC) <sub>1.5</sub> (H <sub>2</sub> O) <sub>2</sub>                    | 290-320         | 0.31                      | 6                |
| Tb <sub>0.8</sub> Eu <sub>0.2</sub> BPD                                                                       | 298-318         | 1.19                      | 7                |
| [Eu <sub>0.7</sub> Tb <sub>0.3</sub> (cam)(Himdc) <sub>2</sub> (H <sub>2</sub> O) <sub>2</sub> ] <sub>3</sub> | 100-450         | 0.11                      | 8                |
| TbDyCo-MOF                                                                                                    | 120–200         | 2.2(3)                    | 9                |
| Na@U <sub>6</sub> P <sub>6</sub>                                                                              | 200-300         | 0.79                      | 10               |
| <b>1</b>                                                                                                      | 120-300         | 0.9                       | <i>This work</i> |
| <b>2</b>                                                                                                      | 100-300         | 2.16                      | <i>This work</i> |
| <b>2-ns@PMMA</b>                                                                                              | 100-300         | 1.19                      | <i>This work</i> |

## References

1. A. M. Kaczmarek, Y.-Y. Liu, C. Wang, B. Laforce, L. Vincze, P. V. D. Voort and R. V. Deun, *Dalton Trans.*, 2017, **46**, 12717-12723.
2. Y. Cui, R. Song, J. Yu, M. Liu, Z. Wang, C. Wu, Y. Yang, Z. Wang, B. Chen and G. Qian, *Adv. Mater.*, 2015, **27**, 1420-1425.
3. Y. J. Cui, H. Xu, Y. F. Yue, Z. Y. Guo, J. C. Yu, Z. X. Chen, J. K. Gao, Y. Yang, G. D. Qian and B. L. Chen, *J. Am. Chem. Soc.*, 2012, **134**, 3979.
4. X. Fan, S. Freslon, C. Daiguebonne, L. L. Pollès, G. Calvez, K. Bernot, X. Yi, G. Huang, and O. Guillou, *Inorg. Chem.*, 2015, **54**, 5534–5546.
5. X. T. Rao, T. Song, J. K. Gao, Y. J. Cui, Y. Yang, C. D. Wu, B. L. Chen and G. D. Qian, *J. Am. Chem. Soc.*, 2013, **135**, 15559.
6. A. Cadiau, C. D. S. Brites, P. M. F. J. Costa, R. A. S. Ferreira, J. Rocha and L. D. Carlos, *ACS Nano*, 2013, **7**, 7213.
7. D. Zhao, X. Rao, J. Yu, Y. Cui, Y. Yang and G. Qian, *Inorg. Chem.*, 2015, **54**, 11193–11199.
8. Y. Q. Wei, R. J. Sa, Q. H. Li and K. C. Wu, *Dalton Trans.*, 2015, **44**, 3067.
9. K. Kumar, S. Chorazy, K. Nakabayashi, H. Sato, B. Sieklucka and S.-I. Ohkoshi, *J. Mater. Chem. C*, 2018, **6**, 8372-8384.
10. D. Wang, Q. Tan, J. Liu and Z. Liu, *Dalton Trans.*, 2016, **45**, 18450 – 18454.
11. H.-Y. Wang, X.-Y. Zheng, L.-S. Long, X.-J. Kong, and L.-S. Zheng. *Inorg. Chem.*, 2021, **60**, 6790–6795.

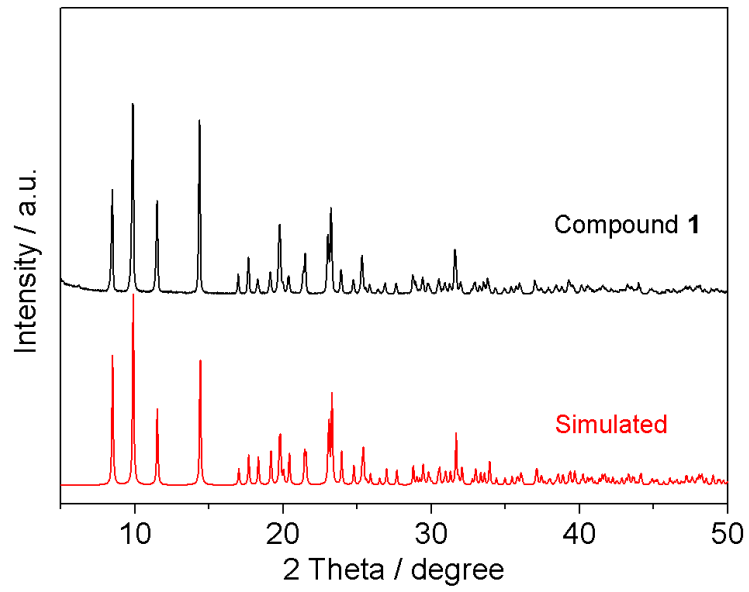

**Fig. S1** Simulated and experimental PXRD patterns of **1**.

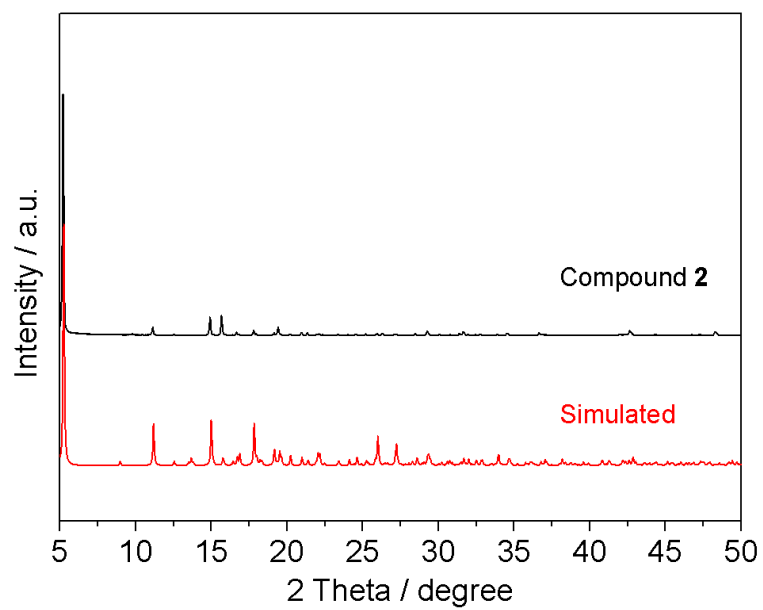

**Fig. S2** Simulated and experimental PXRD patterns of **2**.

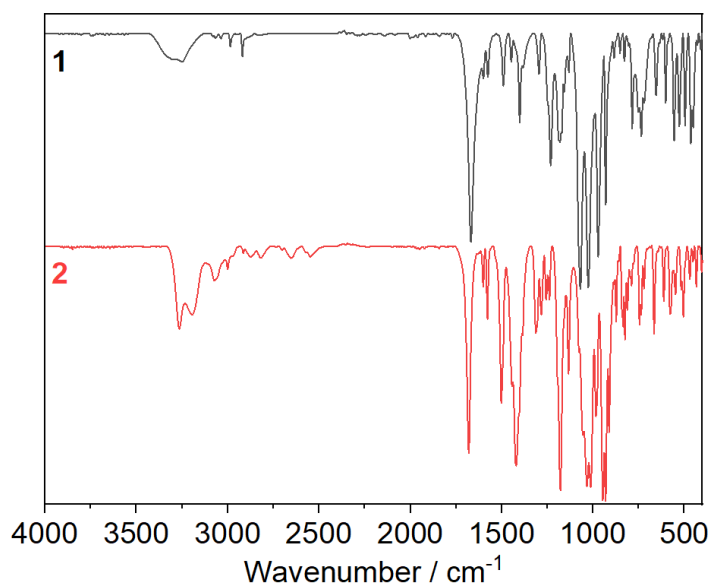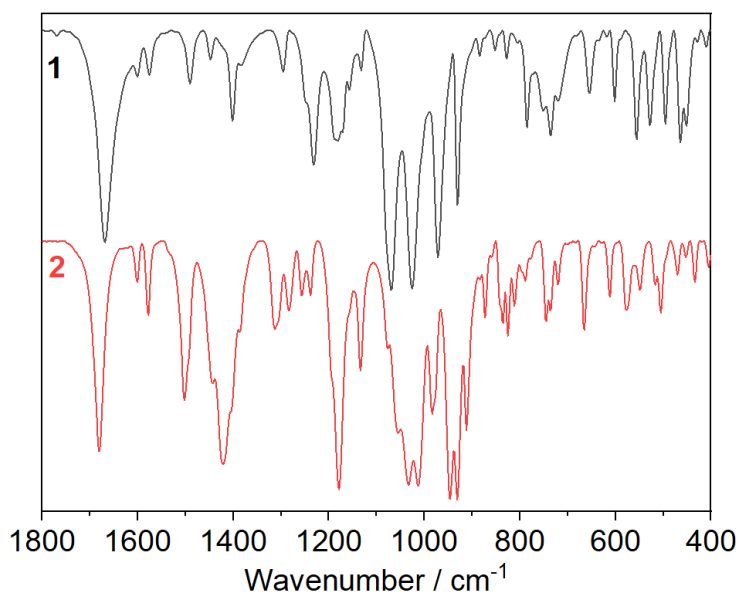

**Fig. S3** The IR spectra of **1** and **2**. The peaks between 3390 cm<sup>-1</sup> and 2962 cm<sup>-1</sup> are assigned to the stretch of O-H from phosphonates and carboxylates. The peaks at 1000-1200 cm<sup>-1</sup> are assigned to symmetric and asymmetric stretching vibrations of P-O and P=O. The peak at 930 cm<sup>-1</sup> is assigned to the stretching vibration of U=O.

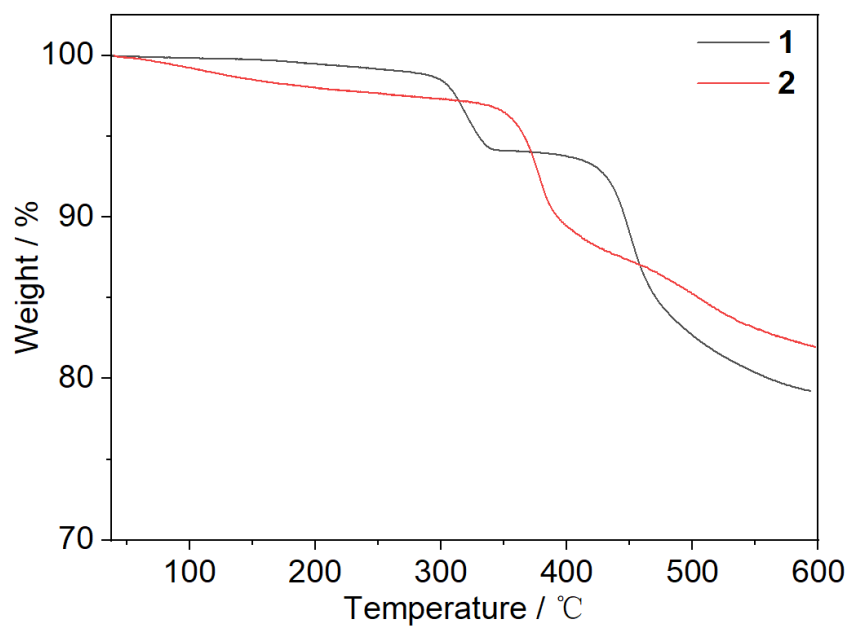

Fig. S4 Thermogravimetric analysis of **1** and **2**.

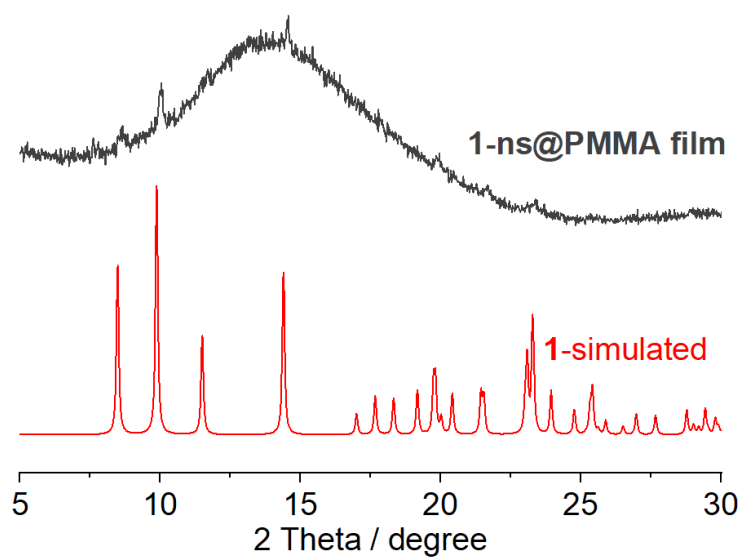

Fig. S5 The PXRD patterns of simulated **1** and **1-ns@PMMA film**.



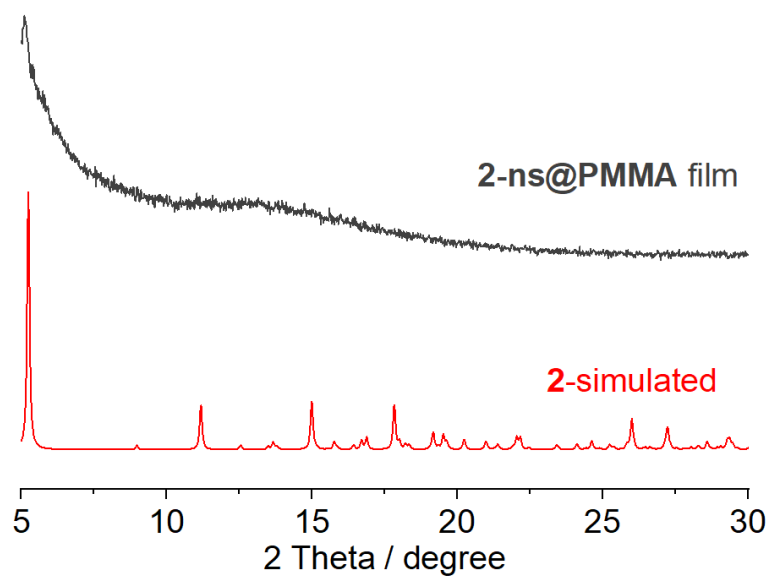

**Fig. S6** The PXRD patterns of simulated **2** and **2-ns@PMMA film**.

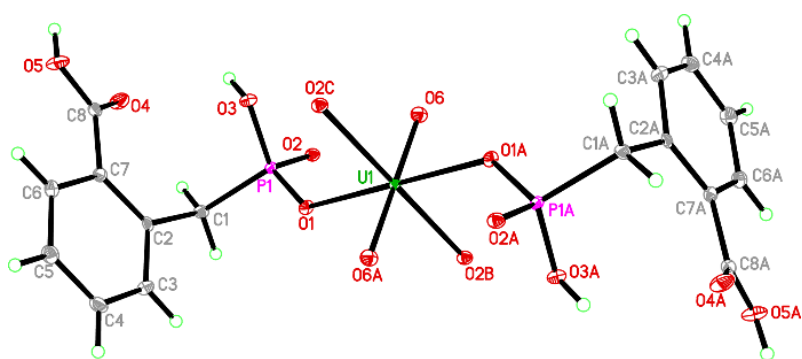

**Fig. S7** View of compound **1**. Displacement ellipsoids are drawn at the 30% probability. level. A: -  
 $x+2, -y+1, -z$ ; B:  $x+1, y, z$ ; C:  $-x+1, -y+1, -z$ .

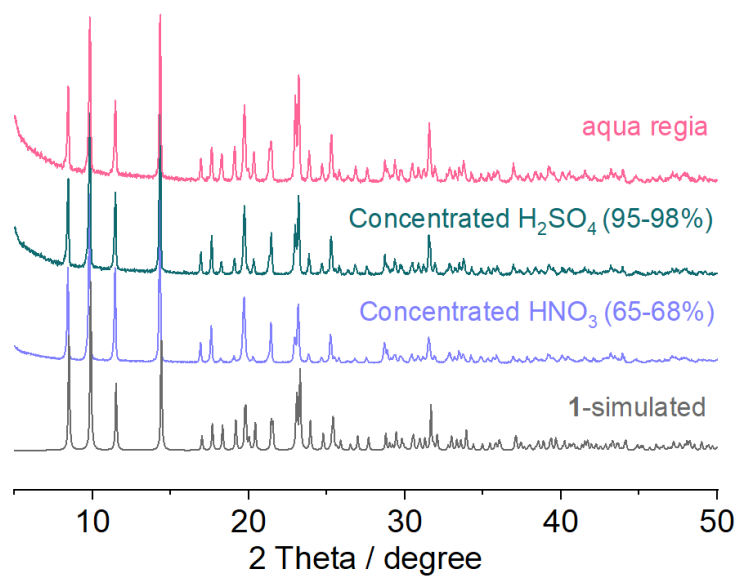

**Fig. S8** The PXRD patterns for compound **1** after soaking in different acidic solution for 24 h.

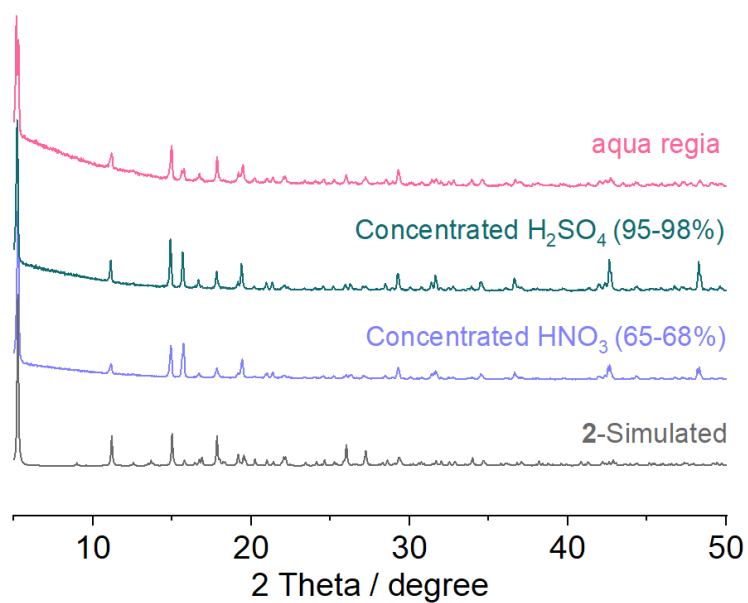

**Fig. S9** The PXRD patterns for compound **2** after soaking in different acidic solution for 24 h.

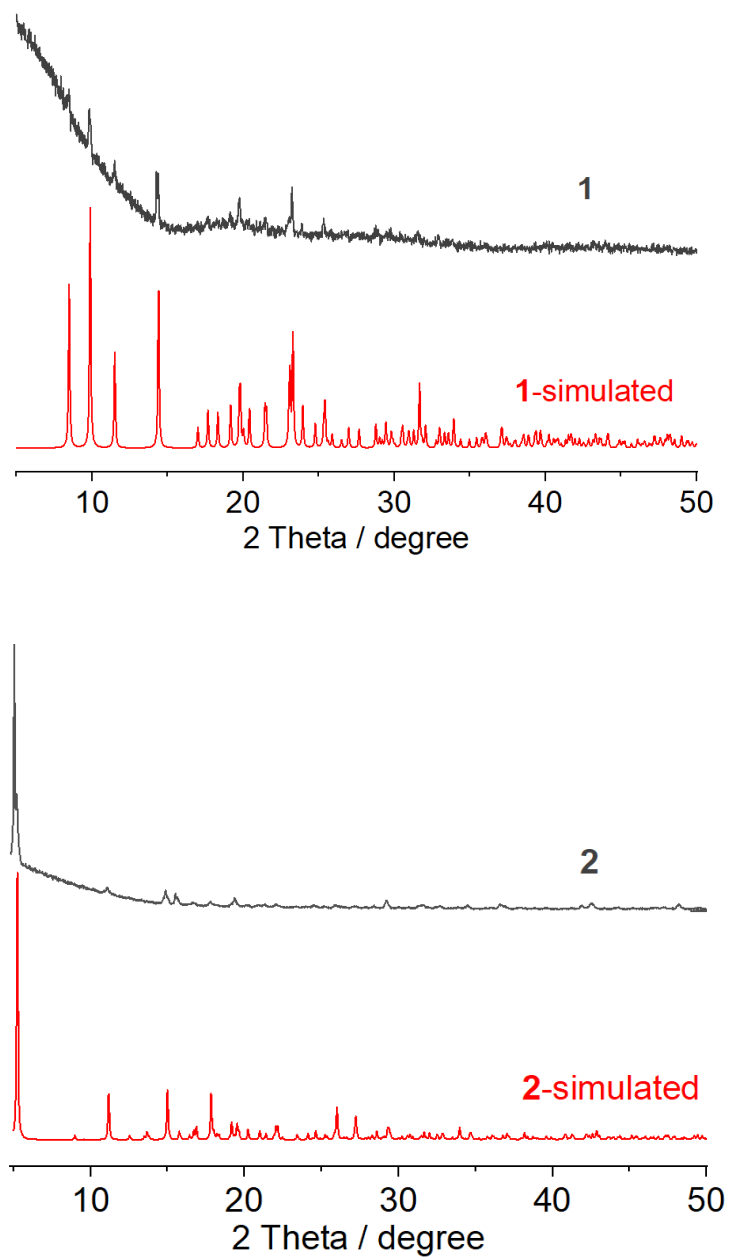

**Fig. S10** The PXRD patterns of **1** and **2**, which represents the pristine sample dispersed in a pH = 11 solution, and the precipitate produced after adjusting pH = 2.

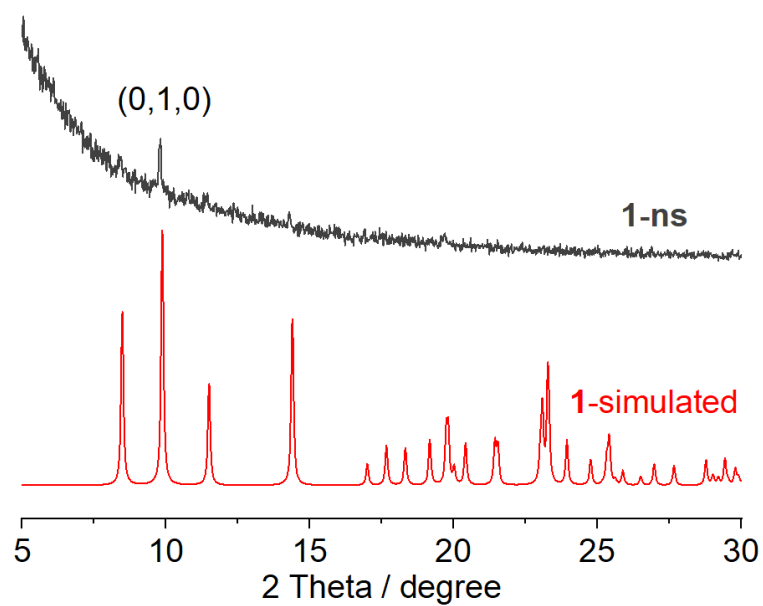

**Fig. S11** The PXRD patterns of simulated 1 and 1-ns, 1-ns was obtained by volatilize the acetone solvent after freeze-thaw process.

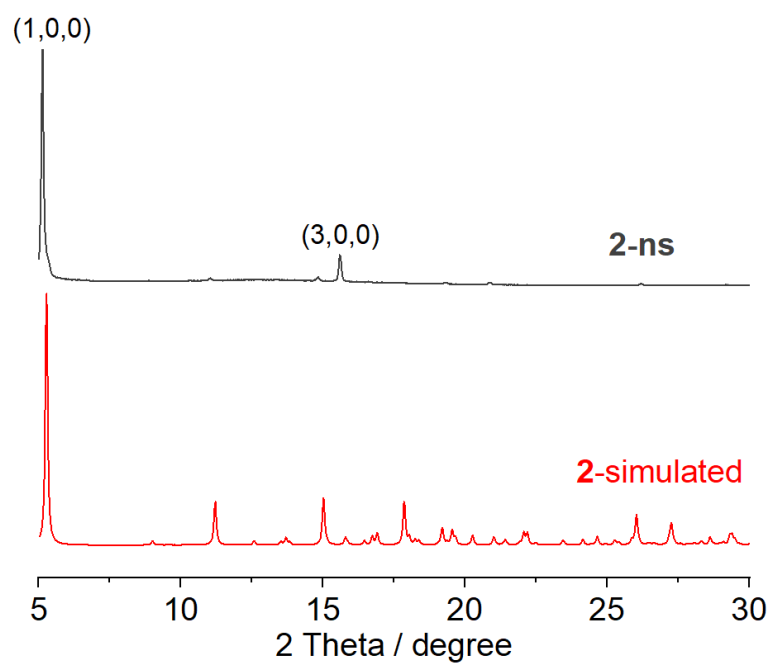

**Fig. S12** The PXRD patterns of simulated 2 and 2-ns, 2-ns was obtained by volatilize the acetone solvent after freeze-thaw process.

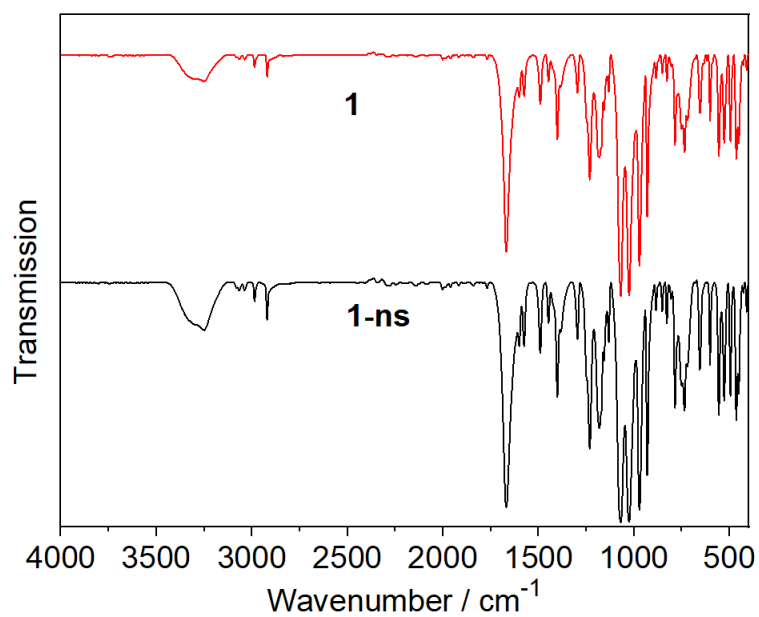

**Fig. S13** The IR spectra of **1** and **1-ns**, **1-ns** was obtained by volatilize the acetone solvent after freeze-thaw process.

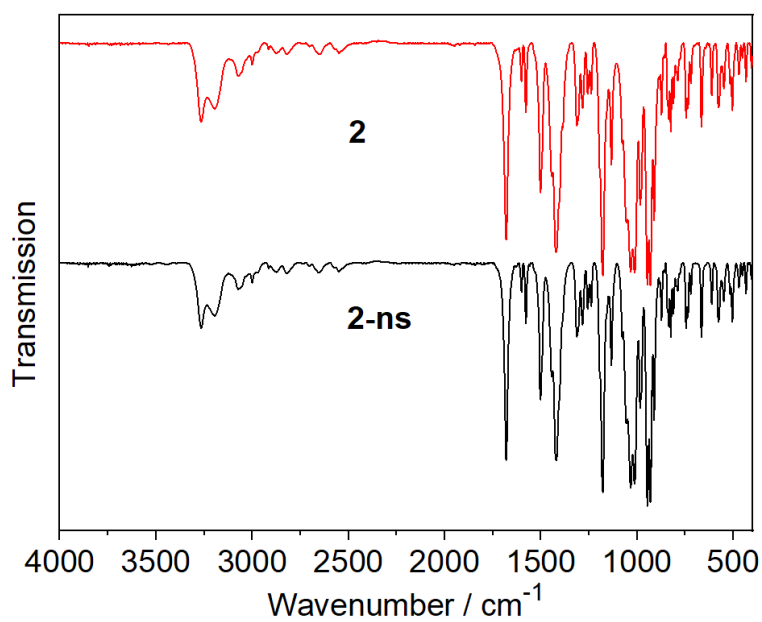

**Fig. S14** The IR spectra of **2** and **2-ns**, **2-ns** was obtained by volatilize the acetone solvent after freeze-thaw process.

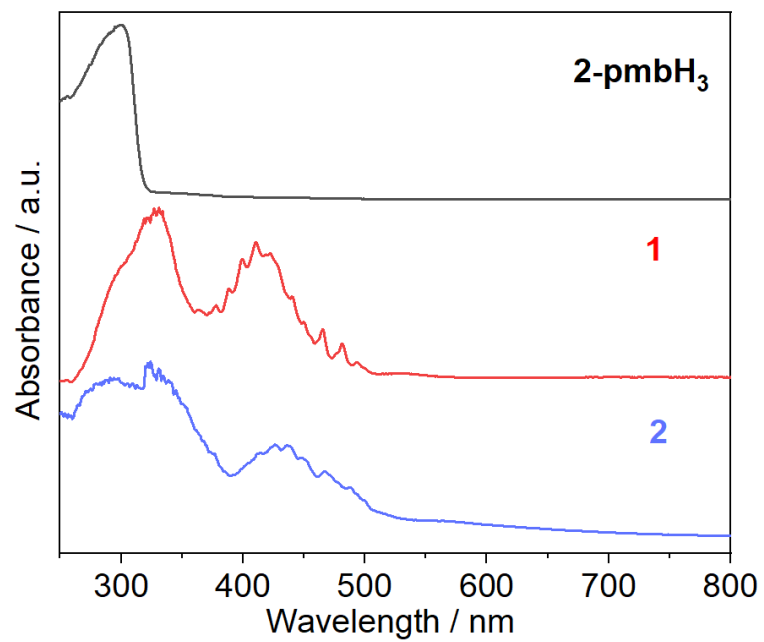

Fig. S15 Absorption spectra of 2-pmbH<sub>3</sub>, **1** and **2**.

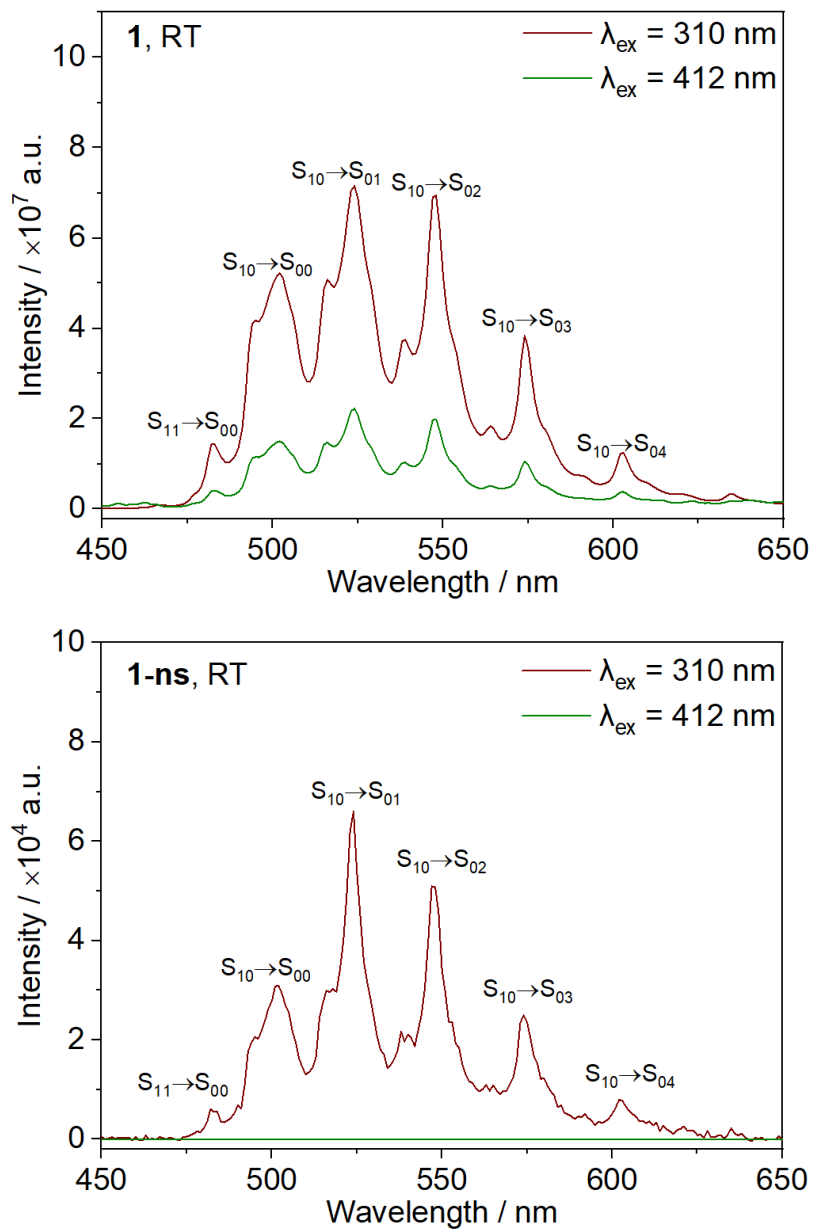

**Fig. S16** Solid-state emission spectra of **1** and **1-ns** under excitation at 310 and 412 nm at room temperature.

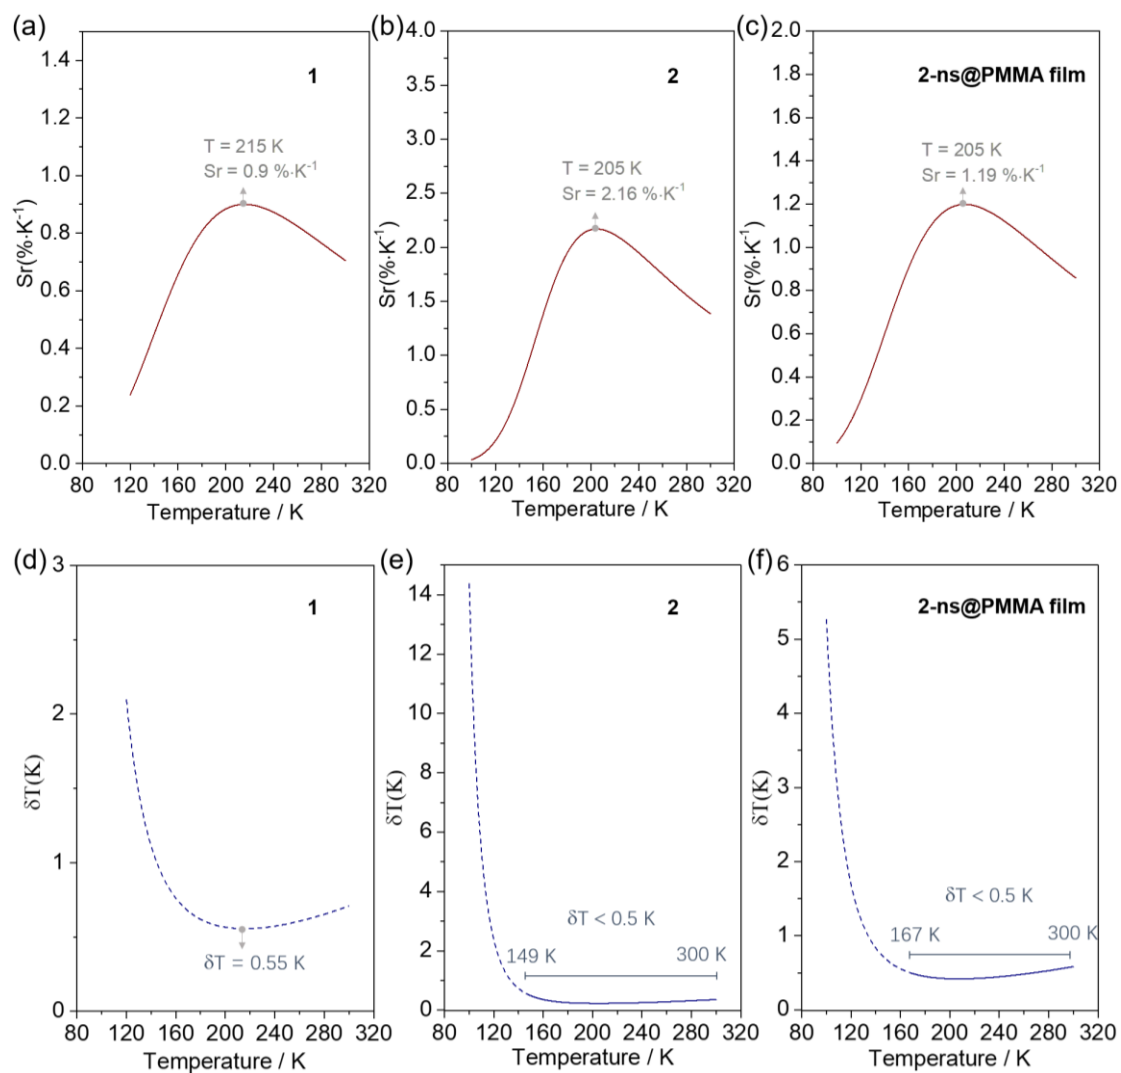

**Fig. S17** a-c) Relative sensitivity of **1** in the 120–300 K range, **2** and **2-ns@PMMA** in the 100–300 K range. b-d) The minimum temperature uncertainty calculated from the sensitivity curve for  $\delta\Delta/\Delta = 0.5\%$  ( $\Delta = I(T)/I_0$ ). The solid line represents the temperature uncertainty  $\delta T < 0.5$  K.



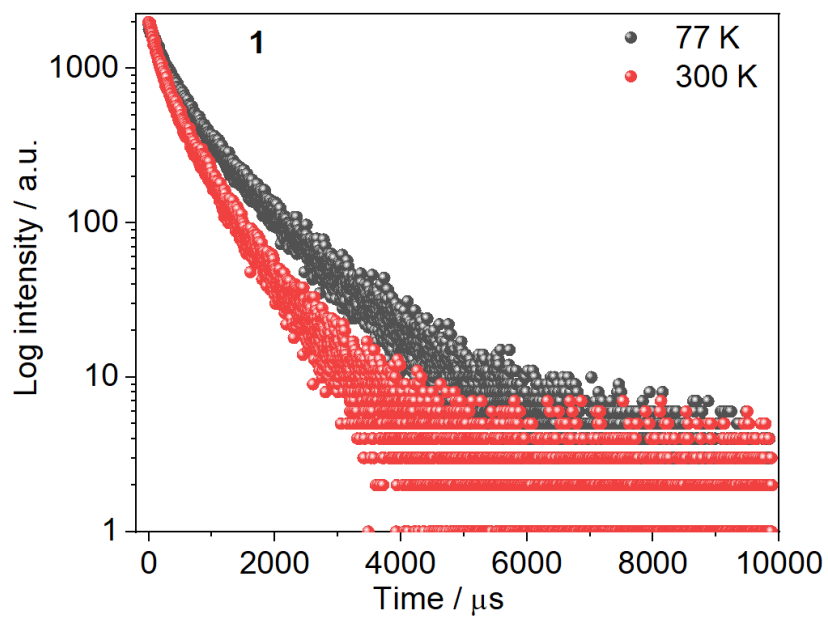

**Fig. S18** Luminescence decay curves of **1** at 77K and 300K. ( $\lambda_{\text{em}} = 522 \text{ nm}$ )

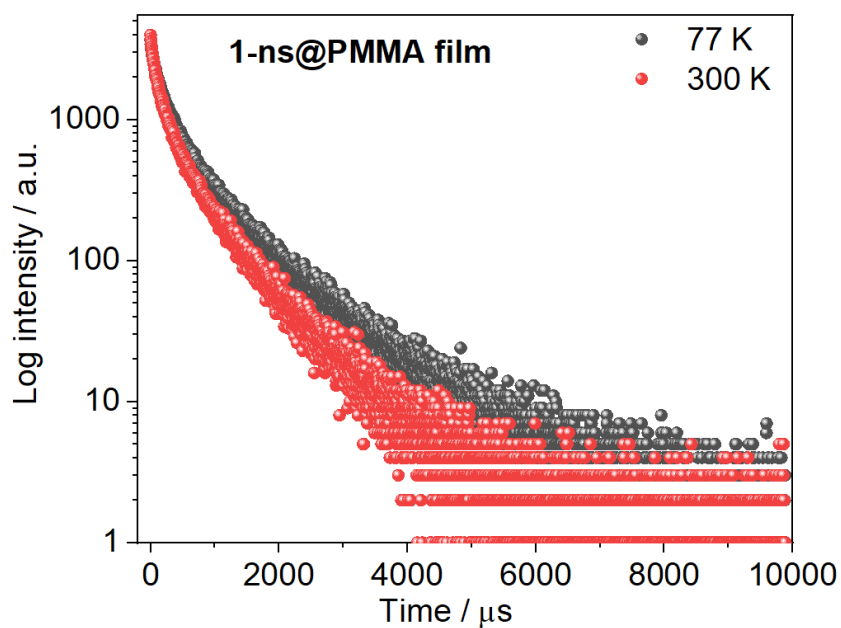

**Fig. S19** Luminescence decay curves of **1-ns@PMMA** at 77K and 300K. ( $\lambda_{\text{em}} = 522 \text{ nm}$ )

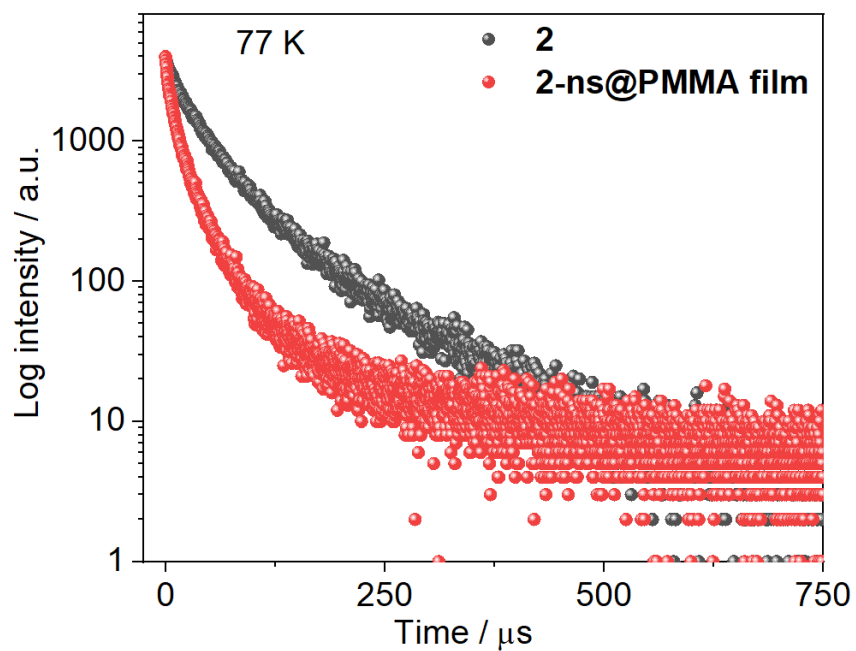

Fig. S20 Luminescence decay curves of **2** and **2-ns@PMMA** at 77K. ( $\lambda_{\text{em}} = 522 \text{ nm}$ )

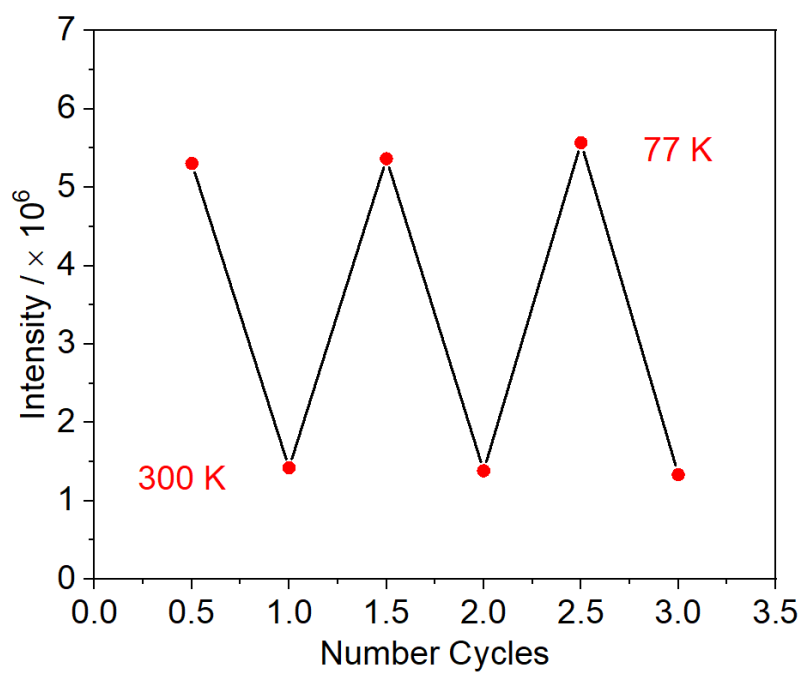

Fig. S21 Emission intensity of **1** at 522 nm in cycles of heating and cooling.
